# Supplementary material
Source: HighWire-hosted journal article supplement (https://erj.ersjournals.com/content/59/6/2101454)

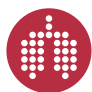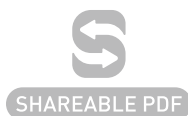

# Right atrial function is associated with right ventricular diastolic stiffness: RA–RV interaction in pulmonary arterial hypertension

Jeroen N. Wessels <sup>1</sup>, Sophia A. Mouratoglou <sup>1</sup>, Jessie van Wezenbeek<sup>1</sup>, M. Louis Handoko<sup>2</sup>, J. Tim Marcus<sup>3</sup>, Lilian J. Meijboom<sup>3</sup>, Berend E. Westerhof<sup>1</sup>, Harm Jan Bogaard<sup>1</sup>, Gustav J. Strijkers <sup>4</sup>, Anton Vonk Noordegraaf <sup>1</sup> and Frances S. de Man<sup>1</sup>

<sup>1</sup>Pulmonary Medicine, Amsterdam Cardiovascular Sciences, Amsterdam UMC, Vrije Universiteit Amsterdam, Amsterdam, The Netherlands. <sup>2</sup>Cardiology, Amsterdam Cardiovascular Sciences, Amsterdam UMC, Vrije Universiteit Amsterdam, Amsterdam, The Netherlands. <sup>3</sup>Radiology and Nuclear Medicine, Amsterdam Cardiovascular Sciences, Amsterdam UMC, Vrije Universiteit Amsterdam, Amsterdam, The Netherlands. <sup>4</sup>Dept of Biomedical Engineering and Physics, Amsterdam Cardiovascular Sciences, Amsterdam UMC, University of Amsterdam, Amsterdam, The Netherlands.

Corresponding author: Frances S. de Man ([fs.deman@amsterdamumc.nl](mailto:fs.deman@amsterdamumc.nl))

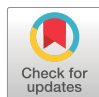

Shareable abstract (@ERSpublications)

Despite increased RA stroke work in PAH patients, severe RV diastolic stiffness is associated with lower RV active filling and high vena cava backflow. Upon treatment, severe RV diastolic stiffness and RA–RV interaction improve in only ~50% of patients. <https://bit.ly/31qai5Z>

**Cite this article as:** Wessels JN, Mouratoglou SA, van Wezenbeek J, *et al.* Right atrial function is associated with right ventricular diastolic stiffness: RA–RV interaction in pulmonary arterial hypertension. *Eur Respir J* 2022; 59: 2101454 [DOI: 10.1183/13993003.01454-2021].

This single-page version can be shared freely online.

Copyright ©The authors 2022.

This version is distributed under the terms of the Creative Commons Attribution Non-Commercial Licence 4.0. For commercial reproduction rights and permissions contact [permissions@ersnet.org](mailto:permissions@ersnet.org)

Received: 22 May 2021  
Accepted: 24 Oct 2021

## Abstract

**Background** Pulmonary arterial hypertension (PAH) patients have altered right atrial (RA) function and right ventricular (RV) diastolic stiffness. This study assessed the impact of RV diastolic stiffness on RA–RV interaction.

**Methods** PAH patients with low or high end-diastolic elastance ( $E_{ed}$ ) ( $n=94$ ) were compared with controls ( $n=31$ ). Treatment response was evaluated in 62 patients. RV and RA longitudinal strain, RA emptying and RV filling were determined and diastole was divided into a passive and active phase. Vena cava backflow was calculated as RA active emptying–RV active filling and RA stroke work as RA active emptying $\times$ RV end-diastolic pressure.

**Results** With increased  $E_{ed}$ , RA and RV passive strain were reduced while active strain was preserved. In comparison to controls, patients had lower RV passive filling but higher RA active emptying and RA stroke work. RV active filling was lower in patients with high  $E_{ed}$ , resulting in higher vena cava backflow. Upon treatment,  $E_{ed}$  was reduced in ~50% of the patients with high  $E_{ed}$ , which coincided with larger reductions in afterload, RV mass and vena cava backflow and greater improvements in RV active filling and stroke volume in comparison with patients in whom  $E_{ed}$  remained high.

**Conclusions** In PAH, RA function is associated with changes in RV function. Despite increased RA stroke work, severe RV diastolic stiffness is associated with reduced RV active filling and increased vena cava backflow. In 50% of patients with high baseline  $E_{ed}$ , diastolic stiffness remained high, despite treatment. A reduction in  $E_{ed}$  coincided with a large reduction in afterload, increased RV active filling and decreased vena cava backflow.

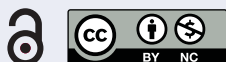

Supplement: inline-supplementary-material-2 [file inline-supplementary-material-2.pdf]
